# Supplementary material for: GABA decrease is associated with degraded neural specificity in the visual cortex of glaucoma patients
Source: PubMed Central journal article supplement (PMC10310759; doi:10.1038/s42003-023-04918-8), 2023-06-29
Supplement: 42003_2023_4918_MOESM1_ESM.pdf [file 42003_2023_4918_MOESM1_ESM.pdf]

## Supplementary material for:

# GABA decrease is associated with degraded neural specificity in the visual cortex of glaucoma patients

Ji Won Bang<sup>1</sup>, Carlos Parra<sup>1</sup>, Kevin Yu<sup>1</sup>, Gadi Wollstein<sup>1-3</sup>,  
Joel S. Schuman<sup>1-4</sup>, Kevin C. Chan<sup>1-5\*</sup>

<sup>1</sup>Department of Ophthalmology, NYU Grossman School of Medicine, NYU Langone Health, New York University, New York, New York, 10017, USA.

<sup>2</sup>Center for Neural Science, College of Arts and Science, New York University, New York, New York, 10003, USA.

<sup>3</sup>Department of Biomedical Engineering, Tandon School of Engineering, New York University, New York, New York, 11201, USA.

<sup>4</sup>Neuroscience Institute, NYU Grossman School of Medicine, NYU Langone Health, New York University, New York, New York, 10016, USA.

<sup>5</sup>Department of Radiology, NYU Grossman School of Medicine, NYU Langone Health, New York University, New York, New York, 10016, USA.

\*Correspondence to: Kevin C. Chan ([chuenwing.chan@fulbrightmail.org](mailto:chuenwing.chan@fulbrightmail.org))

Contains:

4 Supplementary Figures

1 Supplementary Table

**Supplementary Fig. 1: Neural specificity across groups.**

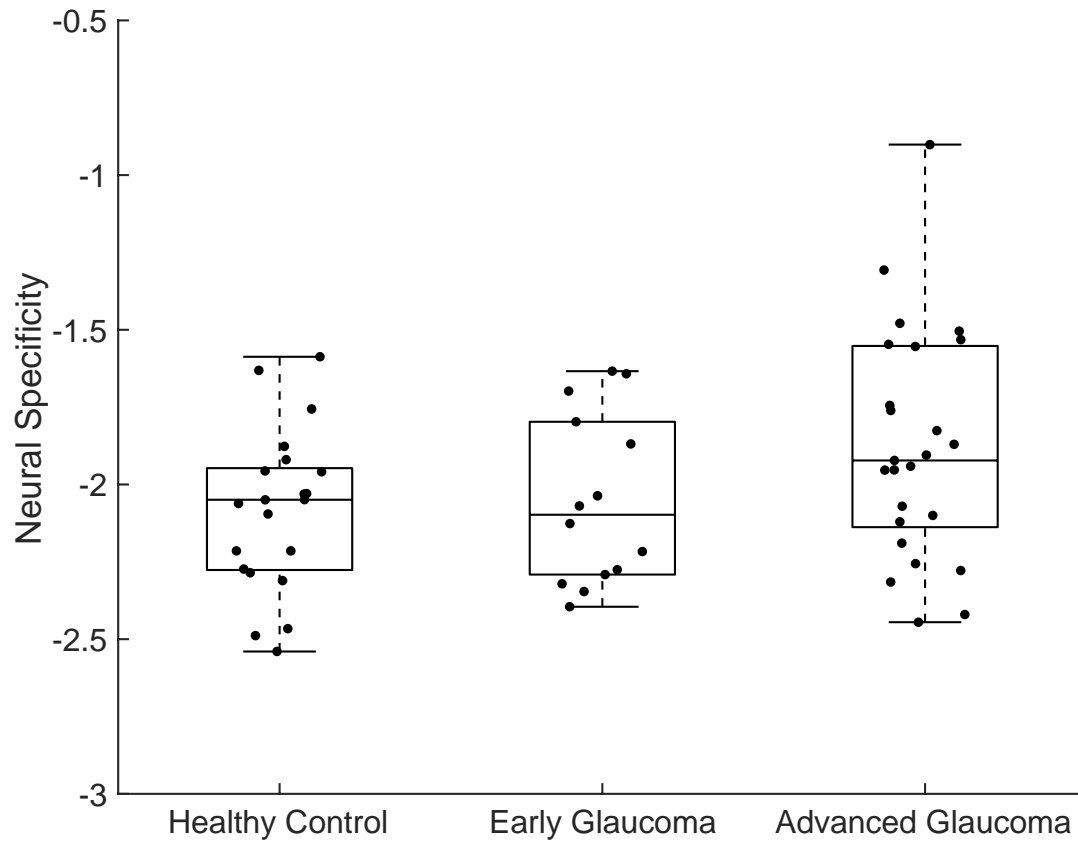

The group effect was not significant, although there was a trend toward significance ( $F(2,57)=2.873$ ,  $P=0.065$ , partial  $\eta^2=0.092$ ). More negative value of neural specificity indicates a stronger specificity. The distributions are represented using box and whisker plots. Healthy control:  $n=21$ , early glaucoma:  $n=14$ , advanced glaucoma:  $n=25$ .

**Supplementary Fig. 2: The relationship between neural specificity, age, retinal structure, and gray matter volume in the entire sample including glaucoma and healthy subjects.**

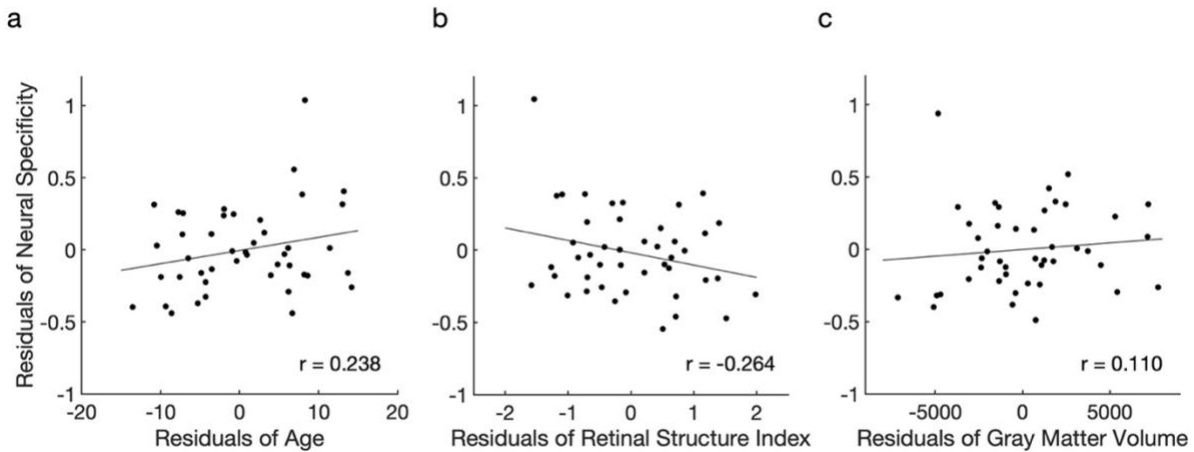

**a** Age was not associated with neural specificity after adjusting the effects of the GABA, glutamate, retinal structure index, and the gray matter volume ( $r=0.238$ ,  $P=0.140$ ;  $n=44$ ). **b** The retinal structure index did not predict the neural specificity after controlling for the GABA, glutamate, age, and the gray matter volume ( $r=-0.264$ ,  $P=0.099$ ;  $n=44$ ). **c** The gray matter volume of the visual cortex was not correlated with the neural specificity after adjusting the effects of the GABA, glutamate, age, and the retinal structure index ( $r=0.110$ ,  $P=0.498$ ;  $n=44$ ).

**Supplementary Fig. 3: The relationship between neural specificity and gray matter volume within the glaucoma group.**

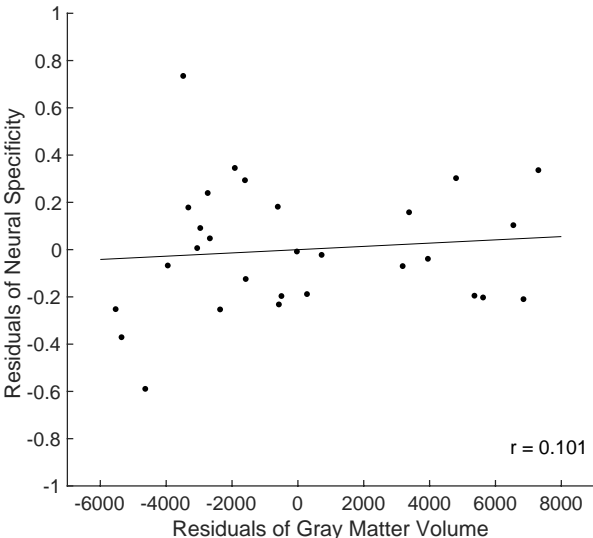

The gray matter volume was not correlated with neural specificity after controlling for the GABA, glutamate, age, and the retinal structure index ( $r=0.101$ ,  $P=0.630$ ;  $n=29$ ).

**Supplementary Fig. 4: The relationship between neural specificity, GABA, glutamate, age, retinal structure index, and gray matter volume in the sample of healthy subjects.**

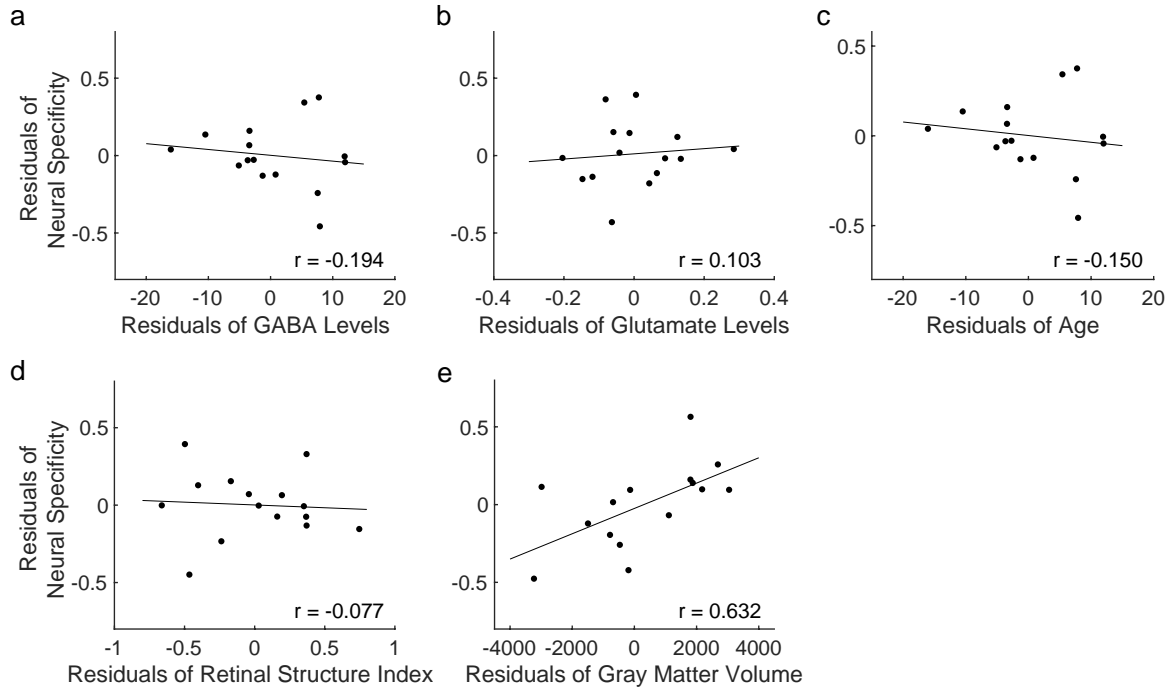

**a** The GABA levels were not associated with neural specificity after adjusting the effects of the glutamate, age, retina structure, and the gray matter volume ( $r=-0.194$ ,  $P=0.567$ ;  $n=15$ ). **b** The glutamate did not predict neural specificity after controlling the effects of the GABA, age, retina structure, and the gray matter volume ( $r=0.103$ ,  $P=0.763$ ;  $n=15$ ). **c** The age was not correlated with neural specificity after adjusting the effects of the GABA, glutamate, retina structure, and the gray matter volume ( $r=-0.150$ ,  $P=0.660$ ;  $n=15$ ). **d** The retina structure was not associated with neural specificity after controlling for the effects of the GABA, glutamate, age, and the gray matter volume ( $r=-0.077$ ,  $P=0.823$ ;  $n=15$ ). **e** The gray matter volume predicted neural specificity after adjusting the effects of the GABA, glutamate, age, and the retina structure ( $r=0.632$ ,  $P=0.037$ ;  $n=15$ ).

## Supplementary Table. 1: Minimum Reporting Standards for in vivo Magnetic Resonance Spectroscopy

| Sequence                                                                                                                                                                                                                                                                       | MEGA-PRESS                                                                                                                                                            | PRESS                                                                                     |
|--------------------------------------------------------------------------------------------------------------------------------------------------------------------------------------------------------------------------------------------------------------------------------|-----------------------------------------------------------------------------------------------------------------------------------------------------------------------|-------------------------------------------------------------------------------------------|
| <b>1. Hardware</b>                                                                                                                                                                                                                                                             |                                                                                                                                                                       |                                                                                           |
| a. Field strength [T]                                                                                                                                                                                                                                                          | 3 Tesla                                                                                                                                                               | 3 Tesla                                                                                   |
| b. Manufacturer                                                                                                                                                                                                                                                                | Siemens                                                                                                                                                               | Siemens                                                                                   |
| c. Model (software version if available)                                                                                                                                                                                                                                       | Prisma                                                                                                                                                                | Prisma                                                                                    |
| d. RF coils: nuclei (transmit/receive), number of channels, type, body part                                                                                                                                                                                                    | 20-channel head coil                                                                                                                                                  | 20-channel head coil                                                                      |
| e. Additional hardware                                                                                                                                                                                                                                                         | NA                                                                                                                                                                    | NA                                                                                        |
| <b>2. Acquisition</b>                                                                                                                                                                                                                                                          |                                                                                                                                                                       |                                                                                           |
| a. Pulse sequence                                                                                                                                                                                                                                                              | MEGA-PRESS                                                                                                                                                            | PRESS                                                                                     |
| b. Volume of Interest (VOI) locations                                                                                                                                                                                                                                          | Occipital cortex                                                                                                                                                      | Occipital cortex                                                                          |
| c. Nominal VOI size [cm <sup>3</sup> , mm <sup>3</sup> ]                                                                                                                                                                                                                       | 22 × 22 × 22mm <sup>3</sup>                                                                                                                                           | 22 × 22 × 22mm <sup>3</sup>                                                               |
| d. Repetition Time (TR), Echo Time (TE) [ms, s]                                                                                                                                                                                                                                | TR=1500ms, TE=68ms                                                                                                                                                    | TR=3000ms, TE=30ms                                                                        |
| e. Total number of Excitations or acquisitions per spectrum<br>In time series for kinetic studies<br>i. Number of Averaged spectra (NA) per time-point<br>ii. Averaging method (e.g. block-wise or moving average)<br>iii. Total number of spectra (acquired / in time-series) | 172 averages                                                                                                                                                          | 99 averages                                                                               |
| f. Additional sequence parameters (spectral width in Hz, number of spectral points, frequency offsets)<br>If STEAM:, Mixing Time (TM)<br>If MRSI: 2D or 3D, FOV in all directions, matrix size, acceleration factors, sampling method                                          | Bandwidth 1200Hz<br>512 complex points after removing oversampling<br>Edit pulse frequency 1.90 ppm<br>Edt pulse bandwidth 44.00 Hz<br>Edit center frequency 4.70 ppm | Bandwidth 2500Hz<br>2048 complex points after removing oversampling                       |
| g. Water Suppression Method                                                                                                                                                                                                                                                    | Water was suppressed                                                                                                                                                  | Water was suppressed                                                                      |
| h. Shimming Method, reference peak, and thresholds for "acceptance of shim" chosen                                                                                                                                                                                             | Automatic shimming<br>Manual shimming was performed when the value was greater than 15 Hz                                                                             | Automatic shimming<br>Manual shimming was performed when the value was greater than 15 Hz |
| i. Triggering or motion correction method (respiratory, peripheral, cardiac triggering, incl. device used and delays)                                                                                                                                                          | None                                                                                                                                                                  | None                                                                                      |
| <b>3. Data analysis methods and outputs</b>                                                                                                                                                                                                                                    |                                                                                                                                                                       |                                                                                           |
| a. Analysis software                                                                                                                                                                                                                                                           | LCModel                                                                                                                                                               | LCModel                                                                                   |

|                                                                                                                                         |                                                                                               |                                                                                               |
|-----------------------------------------------------------------------------------------------------------------------------------------|-----------------------------------------------------------------------------------------------|-----------------------------------------------------------------------------------------------|
| b. Processing steps deviating from quoted reference or product                                                                          | NA                                                                                            | NA                                                                                            |
| c. Output measure (e.g. absolute concentration, institutional units, ratio) Processing steps deviating from quoted reference or product | Ratios to total creatine<br>Ratios to NAA                                                     | Ratios to total creatine<br>Ratios to NAA                                                     |
| d. Quantification references and assumptions, fitting model assumptions                                                                 | Basis set provided by the LCMoDel                                                             | Basis set provided by the LCMoDel                                                             |
| <b>4. Data Quality</b>                                                                                                                  |                                                                                               |                                                                                               |
| a. Reported variables (SNR, Linewidth (with reference peaks))                                                                           | SNR: $23.845 \pm 0.379$<br>FWHM: $0.050 \pm 0.001$ (mean $\pm$ S.E.M.) as reported by LCMoDel | SNR: $26.600 \pm 1.360$<br>FWHM: $0.045 \pm 0.001$ (mean $\pm$ S.E.M.) as reported by LCMoDel |
| b. Data exclusion criteria                                                                                                              | CRLB > 20% and S/N < 8                                                                        | CRLB > 20% and S/N < 8                                                                        |
| c. Quality measures of postprocessing Model fitting (e.g. CRLB, goodness of fit, SD of residual)                                        | CRLB for GABA: $8.759 \pm 0.154$ (mean $\pm$ S.E.M.)                                          | CRLB for glutamate: $8.650 \pm 0.400$ (mean $\pm$ S.E.M.)                                     |
| d. Sample Spectrum                                                                                                                      | Figure 1                                                                                      | Figure 1                                                                                      |
